# Supplementary material
Source: ML conference proceedings conference paper supplement (https://openaccess.thecvf.com/content/WACV2021/html/Shen_Efficient_Attention_Attention_WACV_2021_paper.html)
Supplement: Supplementary file 1 [file Shen_Efficient_Attention_Attention_WACV_2021_supplemental.zip]

## **1. Architecture details for experiments on MS-COCO 2017**

Table 1 details the architecture the experiments used on MS-COCO 2017.

## **2. Fine-grain metrics for experiments on MS-COCO 2017**

Table 2 presents fine-grain object detection metrics on MS-COCO 2017. Table 3 presents fine-grain instance segmentation metrics on MS-COCO 2017.

## **References**

- [1] Xiaolong Wang, Ross Girshick, Abhinav Gupta, and Kaiming He. Non-local neural networks. In *CVPR*, 2018.

Table 1. **Architecture details for experiments on MS-COCO 2017 object detection and instance segmentation.** This table assumes the backbone architecture is ResNet-50. For ResNet-101 and ResNeXt-101, the only difference will be the number of ResBlocks in each ResBlock group (res1-4) and/or the type of the blocks (ResNeXtBlock (32x4d) instead of ResBlock)

| Block   | Type                 | Input                   | Output size       |
|---------|----------------------|-------------------------|-------------------|
| input   | Input                | N/A                     | $896 \times 1280$ |
| conv1   | Conv $3 \times 3$    | input                   | $448 \times 640$  |
| maxpool | Maxpool $2 \times 2$ | conv1                   | $224 \times 320$  |
| res1    | ResBlock $\times 3$  | maxpool                 | $224 \times 320$  |
| res2    | ResBlock $\times 4$  | res1                    | $112 \times 160$  |
| res3    | ResBlock $\times 6$  | res2                    | $56 \times 80$    |
| res4    | ResBlock $\times 3$  | res3                    | $28 \times 40$    |
| fpn5    | conv $3 \times 3$    | res4                    | $14 \times 20$    |
| fpn4    | conv $3 \times 3$    | res4 + fpn5 (upsampled) | $28 \times 40$    |
| fpn3    | conv $3 \times 3$    | res3 + fpn4 (upsampled) | $56 \times 80$    |
| fpn2    | conv $3 \times 3$    | res2 + fpn3 (upsampled) | $112 \times 160$  |
| fpn1    | conv $3 \times 3$    | res1 + fpn2 (upsampled) | $224 \times 320$  |
| rpn     | RPN                  | fpn1-4                  | N/A               |
| roi     | RoI Align            | fpn1-4                  | N/A               |

Table 2. **Fine-grain metrics for experiments on MS-COCO 2017 object detection.**  $+n$  NL means adding  $n$  non-local [1] blocks to the backbone and FPN.  $+n$  EA means adding  $n$  EA modules to the backbone and FPN. OOM indicates out-of-memory errors

| Backbone    | AP   | AP-50 | AP-75 | AP-small | AP-medium | AP-large |
|-------------|------|-------|-------|----------|-----------|----------|
| ResNet-50   | 39.4 | 60.6  | 42.8  | 24.7     | 43.0      | 50.9     |
| +1 NL       | 40.3 | 61.9  | 43.6  | 24.3     | 43.8      | 52.2     |
| +1 EA       | 40.2 | 61.9  | 43.6  | 24.9     | 44.0      | 51.5     |
| +5 NL       | 40.7 | 62.1  | 44.2  | 25.3     | 44.5      | 52.0     |
| +5 EA       | 40.6 | 62.8  | 44.2  | 25.0     | 44.6      | 52.3     |
| +7 NL       | OOM  | OOM   | OOM   | OOM      | OOM       | OOM      |
| +7 EA       | 41.2 | 62.7  | 44.8  | 25.8     | 44.9      | 52.5     |
| ResNeXt-101 | 43.5 | 65.4  | 47.5  | 27.0     | 47.9      | 55.3     |
| +7 EA       | 44.9 | 66.8  | 48.7  | 27.1     | 49.1      | 57.6     |

Table 3. **Fine-grain metrics for experiments on MS-COCO 2017 instance segmentation.**  $+n$  NL means adding  $n$  non-local [1] blocks to the backbone and FPN.  $+n$  EA means adding  $n$  EA modules to the backbone and FPN. OOM indicates out-of-memory errors

| Backbone    | AP   | AP-50 | AP-75 | AP-small | AP-medium | AP-large |
|-------------|------|-------|-------|----------|-----------|----------|
| ResNet-50   | 35.1 | 57.0  | 37.2  | 19.9     | 38.1      | 47.7     |
| +1 NL       | 35.9 | 58.2  | 38.1  | 20.9     | 39.2      | 47.9     |
| +1 EA       | 36.0 | 58.0  | 38.3  | 20.3     | 39.0      | 47.9     |
| +5 NL       | 36.3 | 59.4  | 38.5  | 19.7     | 39.8      | 50.4     |
| +5 EA       | 36.2 | 59.2  | 38.2  | 19.9     | 39.9      | 49.4     |
| +7 NL       | OOM  | OOM   | OOM   | OOM      | OOM       | OOM      |
| +7 EA       | 36.7 | 59.1  | 39.2  | 21.6     | 40.2      | 48.6     |
| ResNeXt-101 | 38.5 | 61.8  | 41.0  | 21.7     | 42.5      | 51.7     |
| +7 EA       | 39.3 | 63.0  | 42.0  | 22.6     | 43.0      | 52.4     |
